# Supplementary material for: Associations between klotho and telomere biology in high stress caregivers
Source: publisher site journal article supplement (doi:10.18632/aging.204961), 2023-08-14
Supplement: Supplementary file [file aging-v15i15-204961-supplementary-material-SD1.pdf]

## SUPPLEMENTARY TABLES

**Supplementary Table 1. Relationship between klotho and PBMC telomere length depended on stress group membership.**

| Predictors                              | PBMC telomere length<br>(Unadjusted) |             |              | PBMC telomere length<br>(Adjusted) |             |                  |
|-----------------------------------------|--------------------------------------|-------------|--------------|------------------------------------|-------------|------------------|
|                                         | Estimates                            | CI          | <i>p</i>     | Estimates                          | CI          | <i>p</i>         |
| Intercept                               | 0.21                                 | -0.13–0.55  | 0.216        | 0.43                               | 0.09–0.77   | <b>0.014</b>     |
| Klotho                                  | -0.05                                | -0.16–0.07  | 0.400        | -0.05                              | -0.16–0.06  | 0.350            |
| Group (High-stress)                     | -0.62                                | -1.05–-0.18 | <b>0.005</b> | -0.50                              | -0.91–-0.09 | <b>0.018</b>     |
| Klotho × Group (High-stress)            | 0.21                                 | 0.06–0.35   | <b>0.006</b> | 0.17                               | 0.03–0.31   | <b>0.019</b>     |
| Age                                     |                                      |             |              | -0.00                              | -0.01–-0.00 | <b>&lt;0.001</b> |
| BMI                                     |                                      |             |              | -0.00                              | -0.00–0.00  | 0.630            |
| Observations                            |                                      | 176         |              |                                    | 175         |                  |
| R <sup>2</sup> /R <sup>2</sup> adjusted |                                      | 0.072/0.056 |              |                                    | 0.185/0.161 |                  |

**Supplementary Table 2. Relationship between klotho and CD4+ T Cell telomere length depended on stress group membership.**

| Predictors                              | CD4+ T Cell telomere length<br>(Unadjusted) |             |              | CD4+ T Cell telomere length<br>(Adjusted) |             |                  |
|-----------------------------------------|---------------------------------------------|-------------|--------------|-------------------------------------------|-------------|------------------|
|                                         | Estimates                                   | CI          | <i>p</i>     | Estimates                                 | CI          | <i>p</i>         |
| Intercept                               | 0.21                                        | -0.12–0.55  | 0.215        | 0.42                                      | 0.08–0.77   | <b>0.017</b>     |
| Klotho                                  | -0.04                                       | -0.16–0.07  | 0.440        | -0.05                                     | -0.16–0.06  | 0.368            |
| Group (High-stress)                     | -0.53                                       | -0.96–-0.10 | <b>0.015</b> | -0.43                                     | -0.85–-0.02 | <b>0.040</b>     |
| Klotho × Group (High-stress)            | 0.18                                        | 0.04–0.33   | <b>0.015</b> | 0.15                                      | 0.01–0.29   | <b>0.039</b>     |
| Age                                     |                                             |             |              | -0.00                                     | -0.01–-0.00 | <b>&lt;0.001</b> |
| BMI                                     |                                             |             |              | -0.00                                     | -0.00–0.00  | 0.482            |
| Observations                            |                                             | 175         |              |                                           | 174         |                  |
| R <sup>2</sup> /R <sup>2</sup> adjusted |                                             | 0.053/0.036 |              |                                           | 0.147/0.122 |                  |

**Supplementary Table 3. Relationship between klotho and CD8+CD28– T Cell telomere length depended on stress group membership.**

| Predictors                              | CD8+CD28– T Cell telomere length<br>(Unadjusted) |             |              | CD8+CD28– T Cell telomere length<br>(Adjusted) |             |                  |
|-----------------------------------------|--------------------------------------------------|-------------|--------------|------------------------------------------------|-------------|------------------|
|                                         | Estimates                                        | CI          | <i>p</i>     | Estimates                                      | CI          | <i>p</i>         |
| Intercept                               | 0.22                                             | –0.29–0.73  | 0.397        | 0.53                                           | –0.00–1.06  | 0.051            |
| Klotho                                  | –0.07                                            | –0.25–0.10  | 0.404        | –0.08                                          | –0.25–0.09  | 0.341            |
| Group (High-stress)                     | –0.82                                            | –1.47–0.17  | <b>0.014</b> | –0.68                                          | –1.32–0.04  | <b>0.037</b>     |
| Klotho × Group (High-stress)            | 0.28                                             | 0.06–0.50   | <b>0.014</b> | 0.23                                           | 0.01–0.45   | <b>0.039</b>     |
| Age                                     |                                                  |             |              | –0.01                                          | –0.01–0.00  | <b>&lt;0.001</b> |
| BMI                                     |                                                  |             |              | –0.00                                          | –0.00–0.00  | 0.458            |
| Observations                            |                                                  | 173         |              |                                                | 172         |                  |
| R <sup>2</sup> /R <sup>2</sup> adjusted |                                                  | 0.056/0.039 |              |                                                | 0.140/0.114 |                  |

**Supplementary Table 4. Weak evidence suggesting relationship between klotho and CD8+CD28+ T Cell telomere length may depend on stress group membership.**

| Predictors                              | CD8+CD28+ T Cell Telomere Length<br>(Unadjusted) |             |              | CD8+CD28+ T Cell Telomere Length<br>(Adjusted) |             |                  |
|-----------------------------------------|--------------------------------------------------|-------------|--------------|------------------------------------------------|-------------|------------------|
|                                         | Estimates                                        | CI          | <i>p</i>     | Estimates                                      | CI          | <i>p</i>         |
| Intercept                               | 0.28                                             | –0.10–0.66  | 0.145        | 0.44                                           | 0.06–0.83   | <b>0.024</b>     |
| Klotho                                  | –0.07                                            | –0.19–0.06  | 0.309        | –0.05                                          | –0.17–0.07  | 0.395            |
| Group (High-stress)                     | –0.58                                            | –1.06–0.10  | <b>0.019</b> | –0.40                                          | –0.86–0.06  | 0.089            |
| Klotho × Group (High-stress)            | 0.20                                             | 0.03–0.36   | <b>0.018</b> | 0.14                                           | –0.02–0.29  | 0.084            |
| Age                                     |                                                  |             |              | –0.01                                          | –0.01–0.00  | <b>&lt;0.001</b> |
| BMI                                     |                                                  |             |              | 0.00                                           | –0.00–0.00  | 0.249            |
| Observations                            |                                                  | 175         |              |                                                | 174         |                  |
| R <sup>2</sup> /R <sup>2</sup> adjusted |                                                  | 0.042/0.026 |              |                                                | 0.171/0.146 |                  |
